# Supplementary material
Source: PubMed Central journal article supplement (PMC5680541)
Supplement: jf7b03779_si_001.pdf [file jf7b03779_si_001.pdf]

## Supporting information for publication

Re-solubilization of protein from water insoluble phlorotannin-protein complexes upon acidification;  
Anne M. Vissers, Annelies E. Blok, Adrie H. Westphal, Wouter H. Hendriks, Harry Gruppen, Jean-Paul Vincken

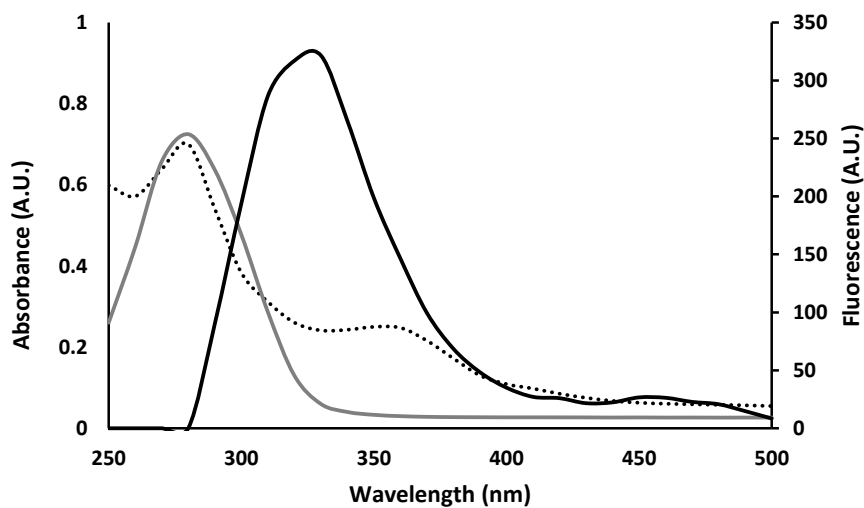

**Figure S1.** Absorbance spectra of pentagalloyl glucose (dotted line), phloroglucinol (grey line) and fluorescence emission spectrum of tryptophan (black line).
